# Supplementary material for: A high-temperature resistant polyimide gate insulator surface-modified with a YOx interlayer for high-performance, solution-processed Li-doped ZnO thin-film transistors
Source: Royal Society of Chemistry journal article supplement (doi:10.1039/c3tc31890g), 2014-01-01
Supplement: c3tc31890g.pdf [file c3tc31890g.pdf]

**Electronic Supplementary Material (ESI) for**

**A high-temperature resistant polyimide gate insulator surface-modified  
with a YO<sub>x</sub> interlayer for high-performance, solution-processed Li-doped  
ZnO thin-film transistors**

Jun-Young Yoon,<sup>ab</sup> Yun Ho Kim,<sup>a</sup> Jae-Won Ka,<sup>a</sup> Sung Kwon Hong,<sup>b</sup> Mi Hye Yi<sup>a</sup> and Kwang-  
Suk Jang<sup>\*a</sup>

<sup>a</sup> *Division of Advanced Materials, Korea Research Institute of Chemical Technology, Daejeon  
305-600, Republic of Korea.*

<sup>b</sup> *Department of Polymer Science and Engineering, Chungnam National University, Daejeon  
305-764, Republic of Korea.*

\* Corresponding author: kjang@kriict.re.kr

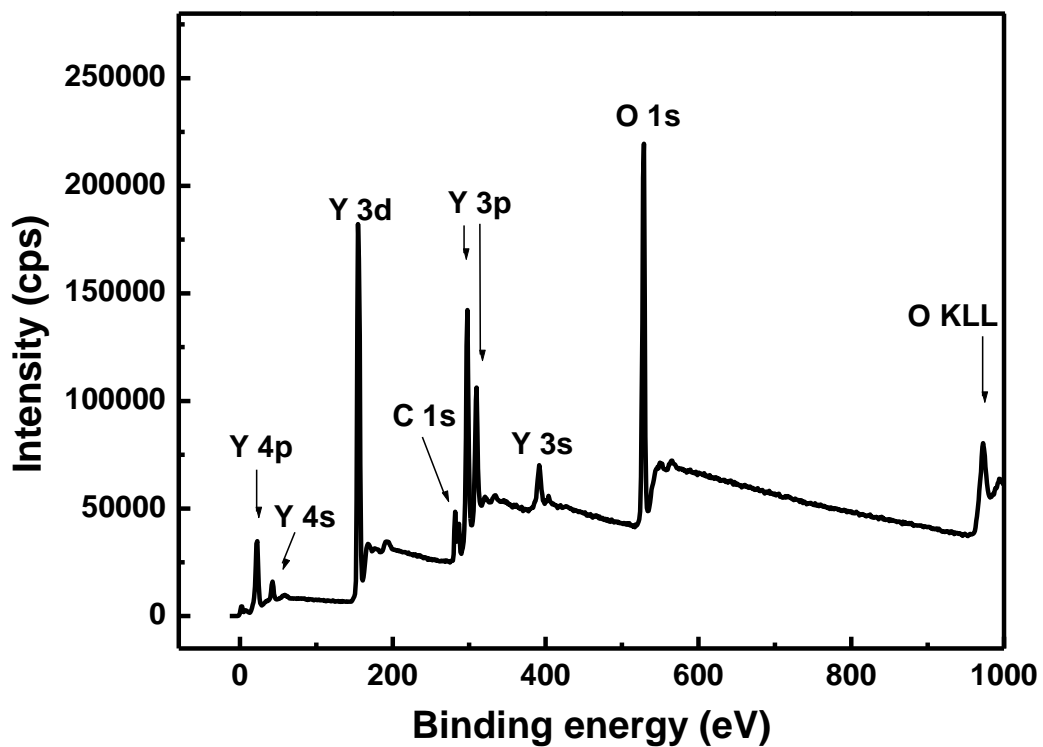

Fig. S1 XPS survey spectrum of the  $\text{YO}_x$  interlayer on the polyimide film.

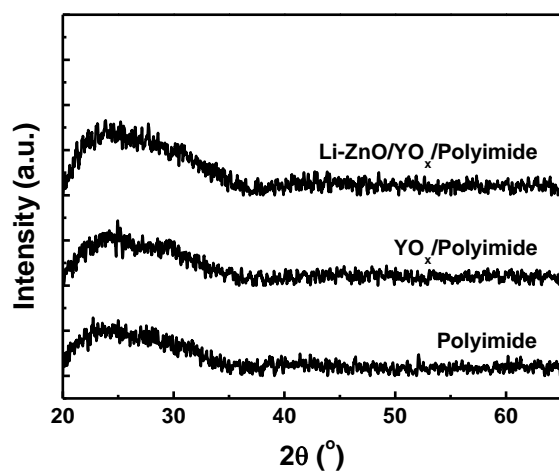

Fig. S2 XRD patterns of the polyimide,  $\text{YO}_x$ /polyimide and Li-ZnO/ $\text{YO}_x$ /polyimide films.

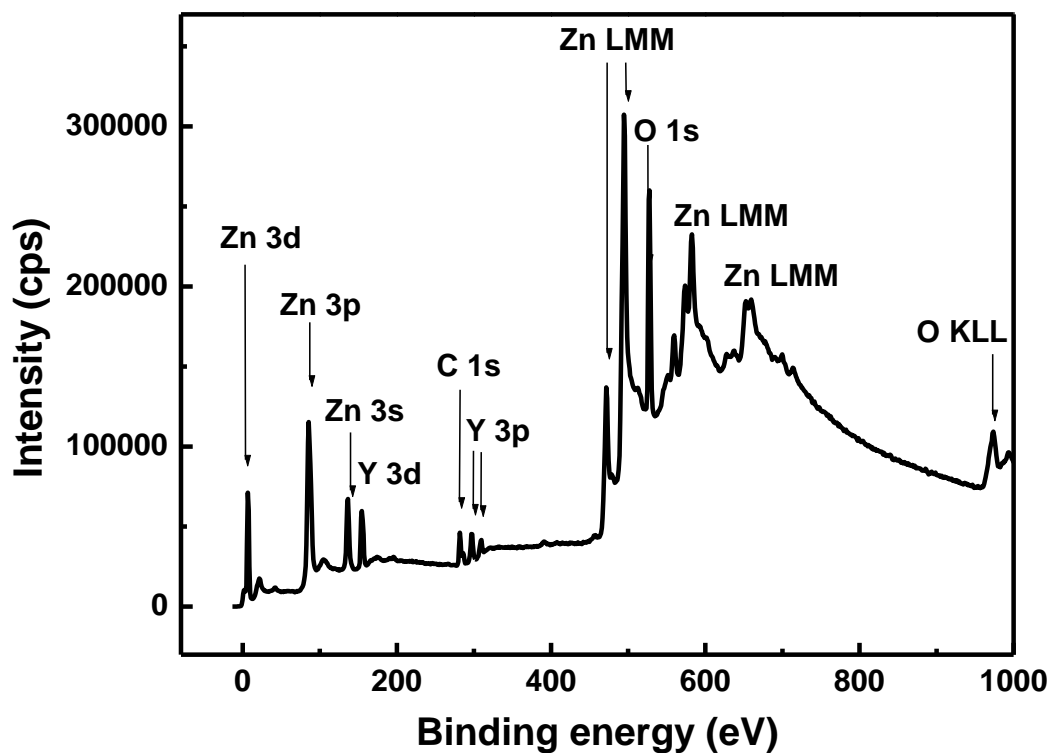

Fig. S3 XPS survey spectrum of the Li-ZnO layer on the  $\text{YO}_x$ /polyimide film.

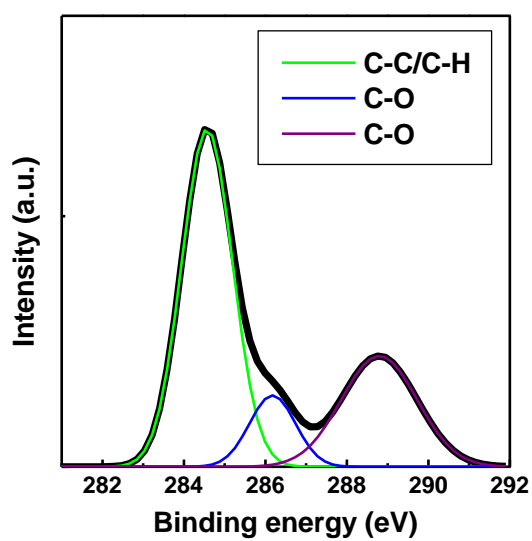

Fig. S4 C 1s XPS spectrum of the Li-ZnO layer on the  $\text{YO}_x$ /polyimide film.

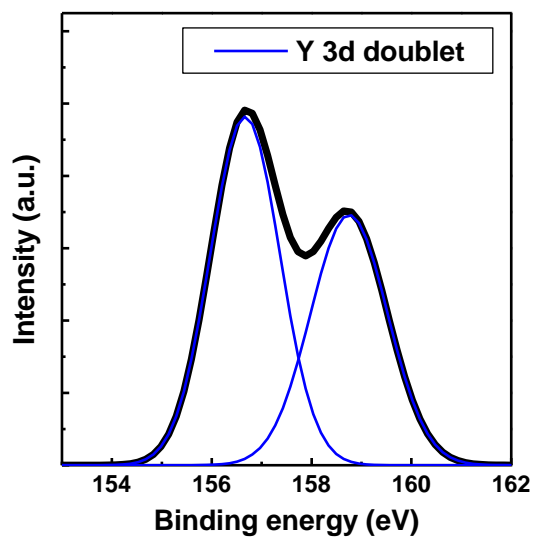

**Fig. S5** Y 3d XPS spectrum of the Li-ZnO layer on the  $\text{YO}_x$ /polyimide film.

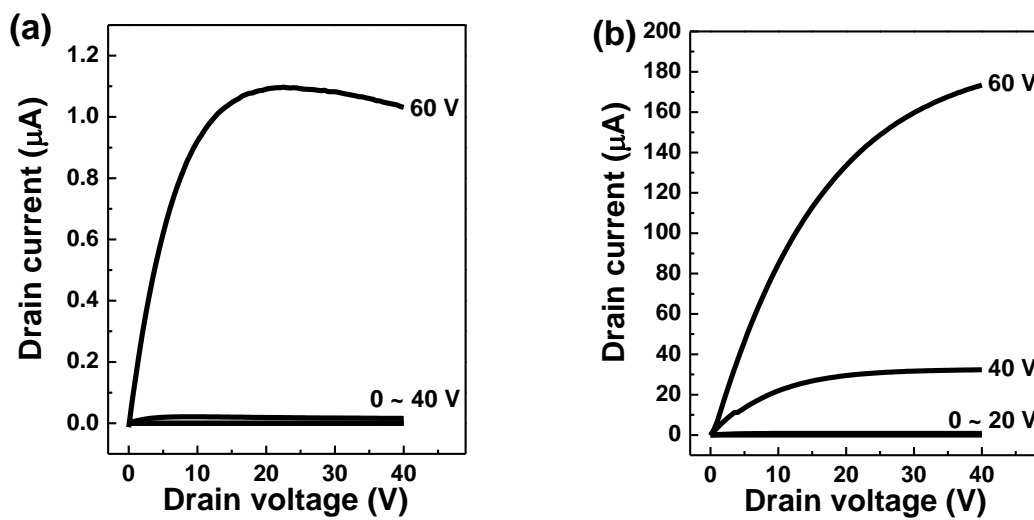

**Fig. S6** Output characteristics of the Li-ZnO TFTs with the (a) polyimide and (b)  $\text{YO}_x$ /polyimide gate insulators.

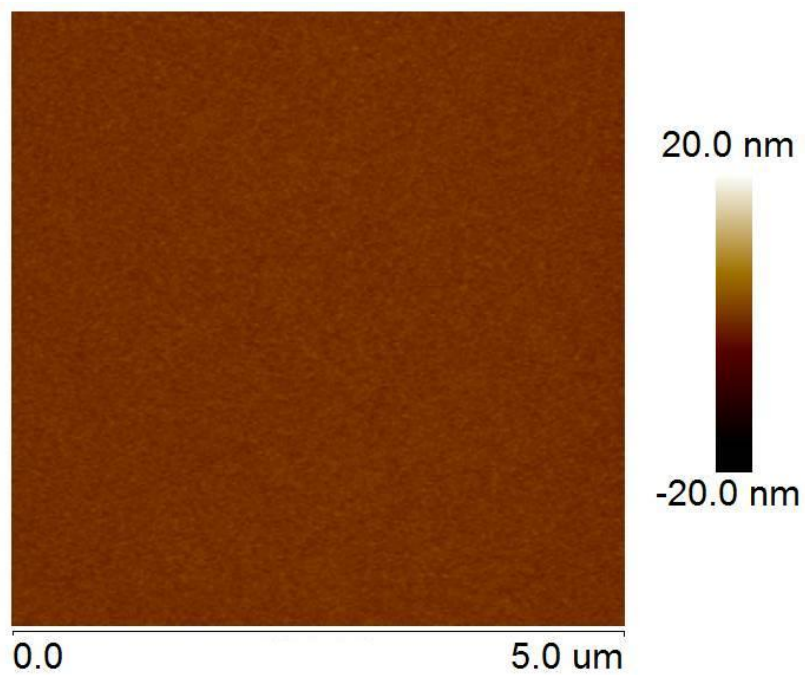

**Fig. S7** AFM image (5 μm × 5 μm) of the Li-ZnO layer on the SiO<sub>2</sub> gate insulator.
